# Supplementary material for: Estimating the morbidity and mortality associated with infections due to multidrug-resistant bacteria (MDRB), France, 2012
Source: PubMed Central journal article supplement (PMC5154061; doi:10.1186/s13756-016-0154-z), 2016-12-12
Supplement: 13756_2016_154_MOESM1_ESM.pdf [file 13756_2016_154_MOESM1_ESM.pdf]

**Table a – Parameters used in 3 studies estimating the morbidity and mortality of multidrug-resistant bacteria infections**

| Study                                                            | ECDC/EMEA study [2]                                                                                                                                                                                                                                                                                                                       | Santé publique France study                                                                                                                                                                                                                                                                                                                                                                         | CDC study [3]                                                                                                                                                                                                                                           |
|------------------------------------------------------------------|-------------------------------------------------------------------------------------------------------------------------------------------------------------------------------------------------------------------------------------------------------------------------------------------------------------------------------------------|-----------------------------------------------------------------------------------------------------------------------------------------------------------------------------------------------------------------------------------------------------------------------------------------------------------------------------------------------------------------------------------------------------|---------------------------------------------------------------------------------------------------------------------------------------------------------------------------------------------------------------------------------------------------------|
| <b>Geographic area concerned</b>                                 | Europe                                                                                                                                                                                                                                                                                                                                    | France                                                                                                                                                                                                                                                                                                                                                                                              | USA                                                                                                                                                                                                                                                     |
| <b>Criteria for MDRB selection</b>                               | <ul style="list-style-type: none"> <li>- being frequently responsible for bloodstream infections</li> <li>- AND the associated antibiotic resistance is, in most cases, a marker for multiple resistance to antibiotics</li> <li>- AND data available in the European Antimicrobial Resistance Surveillance Network (EARS-Net)</li> </ul> | <ul style="list-style-type: none"> <li>- being associated with invasive infections, i.e., infections with a bacteria isolated from blood or cerebrospinal fluid</li> <li>- AND having a significant prevalence or having emerged recently</li> <li>- AND being included in a surveillance network in France</li> <li>- AND being multidrug-resistant as defined in the EARS-Net protocol</li> </ul> | <ul style="list-style-type: none"> <li>- bacteria causing severe human infections, resistant to the antibiotics used to treat those infections</li> <li>- for <i>Candida</i> : showing increasing resistance to the drugs used for treatment</li> </ul> |
| <b>MDRB selected</b>                                             |                                                                                                                                                                                                                                                                                                                                           |                                                                                                                                                                                                                                                                                                                                                                                                     |                                                                                                                                                                                                                                                         |
| MRSA <sup>a</sup>                                                | YES                                                                                                                                                                                                                                                                                                                                       | YES                                                                                                                                                                                                                                                                                                                                                                                                 | YES                                                                                                                                                                                                                                                     |
| VISA/VRSA <sup>b</sup>                                           | -                                                                                                                                                                                                                                                                                                                                         | -                                                                                                                                                                                                                                                                                                                                                                                                   | YES                                                                                                                                                                                                                                                     |
| <i>S. pneumoniae</i>                                             | YES (penicillin resistant) for morbidity estimations only                                                                                                                                                                                                                                                                                 | -                                                                                                                                                                                                                                                                                                                                                                                                   | YES (fully resistant to clinically relevant drugs)                                                                                                                                                                                                      |
| GRE <sup>c</sup>                                                 | YES ( <i>E. faecium</i> only)                                                                                                                                                                                                                                                                                                             | YES ( <i>E. faecium</i> + <i>E. faecalis</i> )                                                                                                                                                                                                                                                                                                                                                      | YES                                                                                                                                                                                                                                                     |
| 3GC-R <sup>d</sup> <i>E. coli</i>                                | YES                                                                                                                                                                                                                                                                                                                                       | YES                                                                                                                                                                                                                                                                                                                                                                                                 | YES (ESBL <sup>e</sup> producing only)                                                                                                                                                                                                                  |
| CR <sup>f</sup> <i>E. coli</i>                                   | -                                                                                                                                                                                                                                                                                                                                         | -                                                                                                                                                                                                                                                                                                                                                                                                   | YES                                                                                                                                                                                                                                                     |
| 3GC-R <i>K. pneumoniae</i>                                       | YES                                                                                                                                                                                                                                                                                                                                       | YES                                                                                                                                                                                                                                                                                                                                                                                                 | ESBL producing only                                                                                                                                                                                                                                     |
| CR <i>K. pneumoniae</i>                                          | -                                                                                                                                                                                                                                                                                                                                         | YES                                                                                                                                                                                                                                                                                                                                                                                                 | YES (ESBL <sup>e</sup> producing only)                                                                                                                                                                                                                  |
| CR <sup>g</sup> <i>P. aeruginosa</i>                             | YES                                                                                                                                                                                                                                                                                                                                       | YES                                                                                                                                                                                                                                                                                                                                                                                                 | YES (resistant to 3 or more drug classes)                                                                                                                                                                                                               |
| <i>Acinetobacter spp</i>                                         | -                                                                                                                                                                                                                                                                                                                                         | YES (resistant to imipenem or meropenem, or doripenem)                                                                                                                                                                                                                                                                                                                                              | YES (resistant to 3 or more drug classes)                                                                                                                                                                                                               |
| Other                                                            | -                                                                                                                                                                                                                                                                                                                                         | -                                                                                                                                                                                                                                                                                                                                                                                                   | YES*                                                                                                                                                                                                                                                    |
| <b>Data used for morbidity estimations</b>                       | EARS-Net data (2007) corrected with a pathogen specific rate for keeping nosocomial infection only (eg : 65% for MRSA; ECDC data not shown)                                                                                                                                                                                               | EARS-Net data (2012)                                                                                                                                                                                                                                                                                                                                                                                | <ul style="list-style-type: none"> <li>- for ESBL-producing and CR <i>E. coli</i>, ESBL-producing and CR <i>K. pneumoniae</i>, multidrug-resistant <i>Acinetobacter spp</i>, GRE and multidrug-resistant <i>P. aeruginosa</i> :</li> </ul>              |
| <b>Method for extrapolation to the geographic area concerned</b> | Population covered by EARS-Net for each type of bacteria was obtained directly from countries of the EARS network, except for France : the proportion of resistance reported for                                                                                                                                                          | Population covered by EARS-Net was estimated from the number of inpatient hospital days reported by hospitals whose laboratories had transmitted data to the network (secondary and                                                                                                                                                                                                                 | <ul style="list-style-type: none"> <li>○ 2011 survey of 11,282 patients for proportion of pathogen-specific HAI<sup>h</sup></li> <li>○ estimated for USA using 2010</li> </ul>                                                                          |

|                                                          |                                                                                                                                                       |                                                                                                                                                                                                                                                                                                                                                                                                                                                                                                                              |                                                                                                                                                                                                                                                                                                                                                                                                                                                                                                                                                                                                                                                                                                                                                  |
|----------------------------------------------------------|-------------------------------------------------------------------------------------------------------------------------------------------------------|------------------------------------------------------------------------------------------------------------------------------------------------------------------------------------------------------------------------------------------------------------------------------------------------------------------------------------------------------------------------------------------------------------------------------------------------------------------------------------------------------------------------------|--------------------------------------------------------------------------------------------------------------------------------------------------------------------------------------------------------------------------------------------------------------------------------------------------------------------------------------------------------------------------------------------------------------------------------------------------------------------------------------------------------------------------------------------------------------------------------------------------------------------------------------------------------------------------------------------------------------------------------------------------|
|                                                          | France in EARS-Net was applied to the median incidence of nosocomial bloodstream infections observed in all European countries (ECDC data not shown). | tertiary care hospitals)                                                                                                                                                                                                                                                                                                                                                                                                                                                                                                     | <p>Nationwide Inpatient Sample</p> <ul style="list-style-type: none"> <li>o corrected by CDC's National Healthcare Safety Network data 2009-2010 for proportion of non-susceptible pathogens</li> <li>· for MRSA : Emerging Infection Program/Active Bacterial Core Surveillance (ABC) data 2011 extrapolate to USA using 2011 data from National Center for Health Statistics and US renal data Systems</li> <li>· for VRSA : individual case reports confirmed by CDC (nationally notifiable condition)</li> <li>· for <i>S. pneumoniae</i> : rate for full resistance to clinically relevant drugs in 2011 in ABC (30%) applied to estimates of cases of all <i>S. pneumoniae</i> infections as estimated in a previous study [31]</li> </ul> |
| <b>Infections included</b>                               | Bloodstream infections, lower respiratory tract infections, skin and soft tissue infections and urinary tract infections                              | <ul style="list-style-type: none"> <li>- for all MDRB: invasive infections (bacteria isolated from blood or cerebrospinal fluid), urinary tract infections, skin and soft tissue infections, and surgical site infections ;</li> <li>- for all MDRB excluding GRE: respiratory tract infections ;</li> <li>- for MRSA only: bone and joint infections (does not include surgical site infections);</li> <li>- for GRE only: gastrointestinal tract infections (gastro-intestinal and intra-abdominal infections).</li> </ul> | all infections, except for MRSA (invasive infection only)                                                                                                                                                                                                                                                                                                                                                                                                                                                                                                                                                                                                                                                                                        |
| <b>Origin of infection</b>                               | Nosocomial infection only, except for <i>S. pneumoniae</i>                                                                                            | Healthcare and community associated infections, but diagnosed in a secondary or tertiary hospital.                                                                                                                                                                                                                                                                                                                                                                                                                           | HAIs infections with onset in hospitalized patients only, except for MRSA, VRSA and <i>S. pneumoniae</i> : healthcare and community associated.                                                                                                                                                                                                                                                                                                                                                                                                                                                                                                                                                                                                  |
| <b>Ratio used for estimating non-invasive infections</b> | Specific morbidity ratio for each MDRB and each body site, from literature (table b)                                                                  | Three specific morbidity ratios for each MDRB and each body site, from literature and from the French Point prevalence Study 2012 [7] in order to have a target value and intervals of plausibility (table b)                                                                                                                                                                                                                                                                                                                | Not applicable                                                                                                                                                                                                                                                                                                                                                                                                                                                                                                                                                                                                                                                                                                                                   |

| Ratio used for mortality | Specific mortality ratio for each MDRB and each body site (table c) | Specific mortality ratio for each MDRB and each body site (table c) | <ul style="list-style-type: none"> <li>· for ESBL-producing and CR <i>E. coli</i>, ESBL-producing and CR <i>K. pneumoniae</i>, multidrug-resistant <i>Acinetobacter spp</i>, GRE and multidrug-resistant <i>P. aeruginosa</i> : 6,5% (overall estimate of attributable mortality from antibiotic-resistant hospital onset infections as determined in a previous study [26])</li> <li>· For MRSA : mortality from all causes during hospitalization, extrapolate to USA using 2011 data from National Center for Health Statistics and US renal data Systems</li> <li>· For VRSA : Not applicable (too few infections)</li> <li>· For <i>S. pneumoniae</i> : rate of full resistance applied to the total number of death from pneumococcal disease as estimated in a previous study [31]</li> </ul> |
|--------------------------|---------------------------------------------------------------------|---------------------------------------------------------------------|------------------------------------------------------------------------------------------------------------------------------------------------------------------------------------------------------------------------------------------------------------------------------------------------------------------------------------------------------------------------------------------------------------------------------------------------------------------------------------------------------------------------------------------------------------------------------------------------------------------------------------------------------------------------------------------------------------------------------------------------------------------------------------------------------|
|--------------------------|---------------------------------------------------------------------|---------------------------------------------------------------------|------------------------------------------------------------------------------------------------------------------------------------------------------------------------------------------------------------------------------------------------------------------------------------------------------------------------------------------------------------------------------------------------------------------------------------------------------------------------------------------------------------------------------------------------------------------------------------------------------------------------------------------------------------------------------------------------------------------------------------------------------------------------------------------------------|

| <b>Main results</b>  |                     |                                    |                          |
|----------------------|---------------------|------------------------------------|--------------------------|
| Morbidity estimation | 386,100 cases       | 158,000 (127,000 to 245,000) cases | 2,049,442 cases per year |
| Mortality estimation | 25,100 extra deaths | 12,500 (11,500 to 17,500) deaths   | 23,000 deaths per year   |

<sup>a</sup>Methicillin resistant *Staphylococcus aureus*

<sup>b</sup>Vancomycin-intermediate resistant and resistant *Staphylococcus aureus*

<sup>c</sup>Glycopeptid resistant *Enterococcus*

<sup>d</sup>Third-generation cephalosporin resistant : resistance to cefotaxime or ceftriaxone or ceftazidime

<sup>e</sup>Extended-spectrum beta-lactamase

<sup>f</sup>Carbapenem resistant : resistance to imipenem or meropenem

<sup>g</sup>Carbapenem resistant : imipenem, meropenem, doripenem

<sup>h</sup>Healthcare-associated infections

\*Drug-resistant *Neisseria gonorrhoeae* (any drug), Drug-resistant *Campylobacter*, Fluconazole-resistant *Candida*, Drug-resistant Non-typhoidal *Salmonella*, Drug-resistant *Salmonella Typhi*, Drug-resistant *Shigella*, Drug-resistant tuberculosis, Erythromycin-resistant Group A *Streptococcus*, Clindamycin-resistant Group B *Streptococcus*

**Table b - Ratios used for estimating the incidence of non-invasive infections, ECDC/EMEA vs. Santé publique France studies.**

| Body sites                                                                                                                                     | ECDC/EMEA study [2] | Santé publique France Study |              |              |
|------------------------------------------------------------------------------------------------------------------------------------------------|---------------------|-----------------------------|--------------|--------------|
|                                                                                                                                                |                     | PPS ratio                   | Low value    | High value   |
| No. MRSA urinary tract infections/No. MRSA invasive infections                                                                                 | 0.75 [11]           | 0.98 [7]                    | 0.75 [11]    | 2.30 [12]    |
| No. MRSA respiratory infections/No. MRSA invasive infections                                                                                   | 1.25 [11]           | 2.37 [7]                    | 1.25 [11]    | 2.50 [12]    |
| No. MRSA skin and soft tissue infections and surgical site infections/No. MRSA invasive infections                                             | 5.25 [11]           | 4.17 [7]                    | 4.90 [12]    | 5.25 [11]    |
| No. MRSA bone and joint infections/No. MRSA invasive infections                                                                                | -                   | 0.79 [7]                    | <sup>b</sup> | 1.38 [12]    |
| No. GRE urinary tract infections/No. GRE invasive infections                                                                                   | 3.44 [14]           | 4.33 [7]                    | 2.33 [13]    | 3.44 [14]    |
| No. GRE gastrointestinal tract infections /No. GRE invasive infections                                                                         | 1.89 [14]           | 2.65 [7]                    | 1.89 [14]    | <sup>b</sup> |
| No. GRE skin and soft tissue infections and surgical site infections/No. GRE invasive infections                                               | 4.67 [14]           | 1.46 [7]                    | 4.67 [14]    | 5.00 [13]    |
| No. penicillin resistant <i>S. pneumoniae</i> respiratory infections/No. invasive infections                                                   | 2,7 [32]            | -                           | -            | -            |
| No. 3GC-R <i>E. coli</i> urinary tract infections/No. 3GC-R <i>E. coli</i> invasive infections                                                 | 1.19 [15]           | 5.50 [7]                    | 2.30 [13]    | <sup>b</sup> |
| No. 3GC-R <i>E. coli</i> respiratory tract infections/No. 3GC-R <i>E. coli</i> invasive infections                                             | 1.19 [15]           | 1.08 [7]                    | <sup>b</sup> | 2.50 [13]    |
| No. 3GC-R <i>E. coli</i> skin and soft tissue infections and surgical site infections/No. 3GC-R <i>E. coli</i> invasive infections             | 0.33 [15]           | 1.37 [7]                    | <sup>b</sup> | 4.90 [13]    |
| No. 3GC-R <i>K. pneumoniae</i> urinary tract infections/No. 3GC-R <i>K. pneumoniae</i> invasive infections                                     | 1.19 [15]           | 2.90 [7]                    | 1.19 [15]    | 2.30 [13]    |
| No. 3GC-R <i>K. pneumoniae</i> respiratory tract infections/No. 3GC-R <i>K. pneumoniae</i> invasive infections                                 | 1.19 [15]           | 2.55 [7]                    | 1.19 [15]    | 2.50 [13]    |
| No. 3GC-R <i>K. pneumoniae</i> skin and soft tissue infections and surgical site infections/No. 3GC-R <i>K. pneumoniae</i> invasive infections | 0.33 [15]           | 0.82 [7]                    | 0.33 [15]    | 4.90 [13]    |
| No. CR <i>K. pneumoniae</i> urinary tract infections/No. CR <i>K. pneumoniae</i> invasive infections                                           | -                   | 2.71 [7]                    | 3.00 [16]    | 3.10 [17]    |
| No. CR <i>K. pneumoniae</i> respiratory tract infections/No. CR <i>K. pneumoniae</i> invasive infections                                       | -                   | 3.10 [7]                    | 0.42 [17]    | 1.60 [16]    |
| No. CR <i>K. pneumoniae</i> skin and soft tissue infections and surgical site infections/No. CR <i>K. pneumoniae</i> invasive infections       | -                   | 0.44 <sup>a</sup>           | 0.28 [17]    | 0.60 [16]    |
| No. CR <i>P. aeruginosa</i> urinary tract infections/No. CR <i>P. aeruginosa</i> invasive infections                                           | 11.30 [15]          | 2.11 [7]                    | <sup>b</sup> | 11.30 [15]   |
| No. CR <i>P. aeruginosa</i> respiratory tract infections/No. CR <i>P. aeruginosa</i> invasive infections                                       | 16.00 [15]          | 10.99 [7]                   | <sup>b</sup> | 16.00 [15]   |
| No. CR <i>P. aeruginosa</i> skin and soft tissue infections and surgical site infections/No. CR <i>P. aeruginosa</i> invasive infections       | 4.67 [15]           | 3.07 [7]                    | <sup>b</sup> | 4.67 [15]    |
| No. CR <i>Acinetobacter</i> urinary tract infections/No. CR <i>Acinetobacter</i> invasive infections                                           | -                   | 0.58 <sup>a</sup>           | 0.32 [18]    | 0.83 [17]    |
| No. CR <i>Acinetobacter</i> respiratory tract infections/No. CR <i>Acinetobacter</i> invasive infections                                       | -                   | 4.64 [7]                    | 1.21 [18]    | 3.83 [17]    |
| No. CR <i>Acinetobacter</i> skin and soft tissue infections and surgical site infections/No. CR <i>Acinetobacter</i> invasive infections       | -                   | 0.73 <sup>a</sup>           | 0.29 [18]    | 1.17 [17]    |

<sup>a</sup> no 2012 PPS data for these infections because the prevalence of these MDRB is too low in France; the ratio value applied is the mean value of the 2 ratios from the literature

<sup>b</sup> no data in the literature for these infections; the value of the 2012 PPS ratio was applied  
Invasive infections: bacteria isolated from blood or cerebrospinal fluid

**Table c – Ratios used for estimating mortality associated with infections due to MDRB, ECDC/EMEA vs. Santé publique France studies.**

| Body sites                                                                              | Associated deaths (%) |                             |
|-----------------------------------------------------------------------------------------|-----------------------|-----------------------------|
|                                                                                         | ECDC/EMEA study [2]   | Santé publique France study |
| MRSA invasive infections                                                                | 9.8 [19]              | 9.8 [19]                    |
| MRSA urinary tract infections                                                           | 0.2 [10, 19]          | 0.2 [10, 19]                |
| MRSA respiratory tract infections                                                       | 7.0 [10, 19]          | 7.0 [10, 19]                |
| MRSA skin and soft tissue infections and surgical site infections                       | 1.4 [10, 19]          | 1.4 [10, 19]                |
| MRSA bone and joint infections                                                          | -                     | 9.8 <sup>d</sup>            |
| GRE invasive infections                                                                 | 25.0 [14]             | 25.0 [14]                   |
| GRE urinary tract infections                                                            | 9.0 [14]              | 9.0 [14]                    |
| GRE gastrointestinal tract infections                                                   | 3.0 [14]              | 3.0 [14]                    |
| GRE skin and soft tissue infections and surgical site infections                        | 6.0 [14]              | 6.0 [14]                    |
| 3GC-R <i>E. coli</i> invasive infections                                                | 30 [33]               | 18.0 [20]                   |
| 3GC-R <i>E. coli</i> urinary tract infections                                           | 1 [10, 33]            | 0.0 [21]                    |
| 3GC-R <i>E. coli</i> respiratory tract infections                                       | 21 [10, 33]           | 12.9 [10, 20]               |
| 3GC-R <i>E. coli</i> skin and soft tissue infections and surgical site infections       | 4 [10, 33]            | 2.6 [10, 20]                |
| 3GC-R <i>K. pneumoniae</i> invasive infections                                          | 30 [33]               | 18.0 [20]                   |
| 3GC-R <i>K. pneumoniae</i> urinary tract infections                                     | 1 [10, 33]            | 0.4 [10, 20]                |
| 3GC-R <i>K. pneumoniae</i> respiratory tract infections                                 | 21 [10, 33]           | 12.9 [10, 20]               |
| 3GC-R <i>K. pneumoniae</i> skin and soft tissue infections and surgical site infections | 4 [10, 33]            | 2.6 [10, 20]                |
| CR <i>K. pneumoniae</i> invasive infections                                             | -                     | 37.0 [22]                   |
| CR <i>K. pneumoniae</i> urinary tract infections                                        | -                     | 0.8 [10, 22]                |
| CR <i>K. pneumoniae</i> respiratory tract infections                                    | -                     | 26.4 [10, 22]               |
| 3GC-R <i>K. pneumoniae</i> skin and soft tissue infections and surgical site infections | -                     | 5.4 [10, 22]                |
| CR <i>P. aeruginosa</i> invasive infections                                             | 17.7 [34]             | 33.0 [23]                   |
| CR <i>P. aeruginosa</i> urinary tract infections                                        | 0.4 [10, 34]          | 0.8 [10, 23]                |
| CR <i>P. aeruginosa</i> respiratory infections                                          | 12.7 [10, 34]         | 23.6 [10, 23]               |
| CR <i>P. aeruginosa</i> skin and soft tissue infections and surgical site infections    | 2.6 [10, 34]          | 4.8 [10, 23]                |
| CR <i>Acinetobacter</i> invasive infections                                             | -                     | 36.5 [24]                   |
| CR <i>Acinetobacter</i> urinary tract infections                                        | -                     | 0.8 [10, 24]                |
| CR <i>Acinetobacter</i> respiratory infections                                          | -                     | 26.1 [10, 24]               |
| CR <i>Acinetobacter</i> skin and soft tissue infections and surgical site infections    | -                     | 5.3 [10, 24]                |

<sup>d</sup> no data could be found in literature, the fraction applied is therefore that estimated for invasive infections.  
 Invasive infections: bacteria isolated from blood or cerebrospinal fluid
